# Supplementary material for: SOX9 is a novel cancer stem cell marker surrogated by osteopontin in human hepatocellular carcinoma
Source: PubMed Central journal article supplement (PMC4960550; doi:10.1038/srep30489), 2016-07-26

## Supplementary Information

### **SOX9 is a novel cancer stem cell marker surrogated by osteopontin in human hepatocellular carcinoma**

Takayuki Kawai<sup>1</sup>, Kentaro Yasuchika<sup>1</sup>, Takamichi Ishii<sup>1</sup>, Yuya Miyauchi<sup>1</sup>, Hidenobu Kojima<sup>1</sup>, Ryoya Yamaoka<sup>1</sup>, Hokahiro Katayama<sup>1</sup>, Elena Yukie Yoshitoshi<sup>1, 2</sup>, Satoshi Ogiso<sup>1</sup>, Sadahiko Kita<sup>1</sup>, Katsutaro Yasuda<sup>1, 2</sup>, Ken Fukumitsu<sup>1</sup>, Junji Komori<sup>1</sup>, Etsuro Hatano<sup>1</sup>, Yoshiya Kawaguchi<sup>1, 2</sup>, and Shinji Uemoto<sup>1</sup>

<sup>1</sup>Department of Surgery, Graduate School of Medicine, Kyoto University, Kyoto, Japan;

<sup>2</sup>Center for iPS Cell Research and Application (CiRA), Kyoto University, Kyoto, Japan

## Supplemental Materials and methods

### **Immunohistochemistry**

We fixed liver specimens obtained from HCC patients and stained as previously described.<sup>49, 50</sup> Anti-human SOX9 rabbit antibodies (Millipore, Billerica, MA, USA) diluted at 1:200 and anti-human OPN goat antibodies (R&D systems, Minneapolis, MN, USA) diluted at 1:50 were used as the primary antibodies. Alexa 488-conjugated donkey

anti-rabbit IgG (Molecular Probes, Eugene, OR, USA) for SOX9 staining and Alexa 594-conjugated goat anti-goat IgG (Molecular Probes) for OPN staining were used as the secondary antibodies. All secondary antibodies were diluted at 1:500. Two investigators (T.K. and K.Y.) independently evaluated the slides.

### **Immunocytochemistry of cultured cells**

We fixed the cultured cells and stained as previously described.<sup>49, 50</sup> Anti-human SOX9 rabbit antibodies (Millipore), anti GFP chicken antibodies (Invitrogen), and anti activated beta-catenin mouse antibodies (Millipore) were used as the primary antibodies. All primary antibodies were diluted at 1:200. Alexa 594-conjugated donkey anti-rabbit IgG (Molecular Probes) for SOX9 staining, Alexa 488-conjugated goat anti-chicken IgG (Molecular Probes) for GFP staining, and Alexa 594-conjugated rabbit anti-mouse IgG (Molecular Probes) for activated beta-catenin staining were used as the secondary antibodies. All secondary antibodies were diluted at 1:500. The stained cells were covered with Vectashield mounting medium with DAPI (Vector Laboratories).

**PCR, quantitative PCR, reverse transcription-PCR (RT-PCR), and quantitative RT-PCR (qRT-PCR)**

The total RNA was extracted with RNeasy Mini Kit (Qiagen, Chatsworth, CA, USA) and RNase-free DNase (Qiagen). The genomic DNA was extracted with QuickGene-SP Kit (FUJIFILM, Tokyo, Japan). The Omniscript Reverse Transcription Kit (Qiagen) was used according to the manufacturer's protocol to reverse transcribe 1 µg total RNA into cDNA. Primers were generated for the following genes: SOX9, SOX9 promoter, plasmid EGFP-1 (pEGFP1), epithelial cell adhesion molecule (EpCAM), cluster of differentiation (CD) 90, CD133, CD24, CD13, sal-like protein 4 (SALL4), keratin 19 (K19), transforming growth factor beta receptor 1 (TGFbR1), TGFbR2, snail1, E-cadherin, vimentin, multidrug-resistance protein-5 (MRP5), OPN, cyclin D1 and actin-beta. Their sequences are summarized in Supplemental Table 8. PCR and RT-PCR assays were performed as previously described.<sup>51</sup> We performed qPCR and qRT-PCR assays using SYBR-green PCR Master Mix (Applied Biosystems, Foster City, CA, USA) on the ABI 7500 system (Applied Biosystems). Each target was run in triplicate, and expression levels were normalized to those of actin-beta.

### **Flow cytometry and single-cell culture analysis**

We prepared the cultured cells as described previously.<sup>17, 51, 52</sup> Dead cells were eliminated using 7-amino-actinomycin D (Beckman Coulter, Brea, CA, USA) staining.

We performed single-cell culture analyses as previously described.<sup>14, 47, 48</sup> The individual isolated cells were each sorted into 96-well culture plates using FACS Aria (BD Biosciences). We used a light microscope 10–16h after cell sorting to confirm that each well contained only one cell. Following cell expansion after isolation of each clone, we subjected the cells to flow cytometry.

### **Cell proliferation assay, anchorage-independent growth assay, and sphere-forming assay**

We inoculated the isolated EGFP<sup>+</sup> and EGFP<sup>-</sup> cells differentiated from one EGFP<sup>+</sup> cell at a density of  $1 \times 10^3$  cells per well in 96-well culture plates, which were then allowed to grow for 7 days. The cell numbers were determined using the 3-(4,5-dimethylthiazol-2-yl)-5-(3-carboxymethoxyphenyl)-2-(4-sulfophenyl)-2H-tetrazolium, inner salt (MTS) assay (Cell Titer 96 Aqueous One Solution Reagent, Promega), according to the manufacturer's protocol. After 1 h of incubation, the absorbance value was measured using a plate reader at 490 nm.

To examine the anchorage-independent growth,  $1 \times 10^4$  EGFP<sup>+</sup> and EGFP<sup>-</sup> cells were suspended in 2.0 mL of 0.3% agar (Wako) supplemented with culture medium. The

cell suspension was layered over the bottom layer of 2.0 mL of 0.6% agar. We counted the colonies 14 days after cell sorting.

To investigate the ability to form cell spheres,  $1 \times 10^5$  EGFP<sup>+</sup> and EGFP<sup>-</sup> were seeded in 6-well ultra-low attachment plates (Corning Inc., NY, USA) in serum-free medium. We observed the spheres 5 days after cell sorting.

### **Reagents and drug resistance assay**

5-Fluorouracil (5-FU), TGFb1, and GSK-3b inhibitor CHIR99021 were purchased from Wako and was diluted directly with RPMI-1640 to the desired concentration. TGFb receptor 1 (TGFbR1) inhibitor LY2157299 was obtained from Axon Medchem (Groningen, NL). TGFbR1/R2 inhibitor LY2109761 was purchased from Selleck (Houston, TX, USA). Compounds were dissolved in 100% dimethyl sulfoxide (DMSO; Sigma) and diluted with RPMI-1640 or saline to the desired concentration with a final DMSO concentration of under 0.5%. We investigated the 5-FU resistance of the cells. EGFP<sup>+</sup> and EGFP<sup>-</sup> cells were cultured with 5-FU for 96h at concentrations of  $1 \times 10^{-9}$ ,  $1 \times 10^{-7}$ ,  $1 \times 10^{-5}$ ,  $1 \times 10^{-3}$ , and  $1 \times 10^{-1}$  M. After the culture, MTS assays were performed to determine the half-maximal inhibitory concentrations (IC<sub>50</sub>).

## Xenotransplantation

Male 6 to 10-week-old non-obese diabetic/severe combined immunodeficiency (NOD/SCID) mice (Charles River Laboratories, Inc., Kanagawa, Japan) were used as recipients for xenotransplantation. The isolated EGFP<sup>+</sup> or EGFP<sup>-</sup> cells ( $1.0 \times 10^3$  or  $1.0 \times 10^4$  cells) derived from a single EGFP<sup>+</sup> cell were suspended in 200  $\mu$ L of a mixture of serum-free medium and Matrigel (BD Biosciences) (1:1 volume). The mixture was injected subcutaneously through a 26-gauge needle into the right and left dorsal areas of anesthetized NOD/SCID mice. We monitored tumor formation and tumor size twice a week, and dissected out the tumors 11 weeks after engraftment.

To investigate the differentiation ability *in vivo*, we performed serial transplantation. Tumors generated from single-cell-derived EGFP<sup>+</sup> or EGFP<sup>-</sup> cells were harvested, and then digested with collagenase solution for 30 min at 37°C. After rinsing the tumors in phosphate-buffered saline (PBS), we analyzed and sorted the cells using the FACS Aria. Prior to the second transplantation, the harvested cells were cultured in G418-containing medium for at least 7 days to eliminate cells that originated from the host mice. Thereafter, we sorted these cells according to the EGFP fluorescence, and transplanted  $1 \times 10^4$  EGFP<sup>+</sup> or EGFP<sup>-</sup> cells into NOD/SCID mice in the same way as in the first transplantation.

All animal experimental procedures were performed according to the Animal Protection Guidelines of Kyoto University.

### **Wound healing assay and migration assay**

Wound healing assays were used to assess capacity for cell motility. We seeded the isolated EGFP<sup>+</sup> and EGFP<sup>-</sup> cells differentiated from one EGFP<sup>+</sup> cell at a density of  $1 \times 10^6$  cells per well in 35-mm culture dishes. On reaching full confluency, the cell layer was scratched with a 10- $\mu$ L plastic tip and then cultured with low serum (2% fetal bovine serum) culture medium and 10 ng/ml TGF $\beta$ . Micrographs were taken at 24 h after the scratch.

For migration assays, 8- $\mu$ m-pore 24-well cell culture plates (Corning Inc.) coated with type I collagen were used. We plated  $2.5 \times 10^4$  EGFP<sup>+</sup> and EGFP<sup>-</sup> cells in the upper chamber with serum-free medium and 10 ng/ml TGF $\beta$ ; in the lower chamber, normal culture medium containing 10% fetal bovine serum was added. After 48 h of incubation, the cells on the upper surface of the membrane were removed, and the cells on the lower surface were fixed with 4% paraformaldehyde and stained using the Diff-Quick staining kit (Sysmex, Kobe, Japan).

### **Western blot analysis**

Western blot analysis was performed as previously reported.<sup>53</sup> Primary antibodies recognizing SOX9 (Millipore), OPN (R&D), phospho-smad2 (pSmad2) (Ser465/467, #3108; Cell Signaling, Tokyo, Japan), Smad2 (#5339, Cell Signaling), snail1 (#3879, Cell Signaling), E-cadherin (#14472, Cell Signaling), vimentin (#5741, Cell Signaling), and glyceraldehyde-3-phosphate dehydrogenase (GAPDH) (sc-25778, Santa Cruz Biotechnology Inc., Santa Cruz, CA) were used at 1:1000 dilution. HRP-conjugated bovine anti-rabbit IgG (Molecular Probes) for SOX9, pSmad2, Smad2, snail1, vimentin, and GAPDH staining, HRP-conjugated bovine anti-mouse IgG (Molecular Probes) for E-cadherin staining, and HRP-conjugated bovine anti-goat IgG (Molecular Probes) for OPN staining were used as the secondary antibodies. All secondary antibodies were diluted at 1:2000.

### **SOX9 knockdown and overexpression**

For SOX9 knockdown experiments, we transfected SOX9-siRNA (s13306 or s13307, Invitrogen) or control-siRNA (#4390843, Invitrogen) into HCC cells using Lipofectamine LTX (Invitrogen) according to the manufacturer's protocol. The final concentrations were 10nM. SOX9 expression was significantly downregulated by both SOX9 siRNAs



(Supplemental Fig. 5A). Because the same results were acquired with both siRNAs in all SOX9 knockdown experiments, SOX9-siRNA (s13307) was shown as representative data. For SOX9 overexpression experiments, we transfected SOX9 expression vector (SC321884, OriGene, Rockville, USA) or mock vector (PS100020, OriGene) into HCC cell lines using Lipofectamine LTX (Invitrogen) according to the manufacturer's protocol. SOX9 overexpression was confirmed by qRT-PCR analyses (Supplemental Fig. 5C). For western blot analysis, HCC cells were harvested 48 h post-transfection in SOX9 knockdown/overexpression experiments.

#### **OPN knockdown and overexpression**

For OPN knockdown experiments, we transfected OPN-siRNA (s13376 or s13377, Invitrogen) or control-siRNA (#4390843, Invitrogen) into HCC cells using Lipofectamine LTX (Invitrogen) according to the manufacturer's protocol. The final concentrations were 10nM. OPN expression was significantly downregulated by both OPN siRNAs (Supplemental Fig. 5B). Because the same results were acquired with both siRNAs in all OPN knockdown experiments, OPN-siRNA (s13376) was shown as representative data. For OPN overexpression experiments, we amplified the human OPN open reading frame by RT-PCR, and then ligated the open reading frame with Sgf1-RsrII-digested

plasmid CMV6-AC (PS100020, OriGene). We transfected this OPN expression vector or mock vector (PS100020, OriGene) into HCC cell lines using Lipofectamine LTX (Invitrogen) according to the manufacturer's protocol. OPN overexpression was confirmed by qRT-PCR analyses (Supplemental Fig. 5D). For western blot analysis, HCC cells were harvested 48 h post-transfection in OPN knockdown/overexpression experiments.

#### **T-cell factor/lymphoid enhancer factor (TCF/LEF) luciferase assay**

To evaluate the activation of Wnt/beta-catenin pathway in HCC cells, we performed TCF/LEF luciferase assay in addition to immunocytochemistry of activated beta-catenin. Signal TCF/LEF Reporter Assay Kit (Qiagen) and Dual-Glo™ Luciferase Assay System (Promega) were used according to the manufacturer's protocols.

#### **Enzyme-linked immunosorbent assays (ELISA)**

To measure the serum OPN level of HCC patients, we performed ELISA. Blood samples were collected and stored at 4°C for 1 h. Serum was separated by centrifugation (10,000 g for 10 min) at 4°C, and then stored at -80°C until analysis. We quantitated serum OPN levels, respectively, with the human OPN ELISA kits (Millipore) according

to the manufacture's protocols. The OPN concentration was calculated by a standard curve. Each serum sample was tested in duplicate, and the results were averaged to maintain reliability.

### **Statistical analysis**

The statistical analyses were performed using SPSS version 17.0 (SPSS Inc., IL, USA) and GraphPad Prism software version 5.0 (GraphPad Software Inc., San Diego, CA, USA). Student's *t*-test, *F*-test, Mann-Whitney *U* test, Fisher's exact test or chi-squared test, log-rank test, and repeated-measures analyses of variances were used for assessment. The tumor initiating frequency in xenotransplantation was calculated by extreme limiting dilution analysis.<sup>54</sup> The mean  $\pm$  SD of three or more independent experiments is reported.

Recurrence-free survival (RFS) and overall survival (OS) after the operation were calculated using the Kaplan-Meier method and analyzed with the log-rank test.

Significant variables from the univariate analysis were entered in the multivariate analysis using a Cox regression model with forward stepwise selection. We plotted receiver operating characteristics (ROC) curve for serum OPN level and HCC tumor markers, and calculated area under the ROC curve (AUC). The optimal cutoff value of

OPN was calculated using the maximum sum of sensitivity and specificity as well as using the minimum distance to the top-left corner of the ROC curve. Statistical significance was defined as  $P < 0.05$ .

### Supplemental Table 1

#### Tumor incidence in initial/serial transplantation

|                             | initial Tx              |                         |                         | serial Tx               |
|-----------------------------|-------------------------|-------------------------|-------------------------|-------------------------|
|                             | $1.0 \times 10^4$ cells | $1.0 \times 10^3$ cells | $1.0 \times 10^2$ cells | $1.0 \times 10^4$ cells |
| Huh7 SOX9 <sup>+</sup>      | 8/8 (100%)              | 4/5 (80%)               | 1/3 (33.3%)             | 7/8 (87.5%)             |
| Huh7 SOX9 <sup>-</sup>      | 3/8 (37.5%)             | 0/5 (0%)                | 0/3 (0%)                | 1/8 (12.5%)             |
| HLF SOX9 <sup>+</sup>       | 8/8 (100%)              | 5/5 (100%)              | 2/3 (66.7%)             | 8/8 (100%)              |
| HLF SOX9 <sup>-</sup>       | 3/8 (37.5%)             | 1/5 (20%)               | 0/3 (0%)                | 2/8 (25%)               |
| PLC/PRF/5 SOX9 <sup>+</sup> | 7/8 (87.5%)             | 5/5 (100%)              | 1/3 (33.3%)             | 6/7 (85.7%)             |
| PLC/PRF/5 SOX9 <sup>-</sup> | 3/8 (37.5%)             | 0/5 (0%)                | 0/3 (0%)                | 1/7 (14.3%)             |
| Hep3B SOX9 <sup>+</sup>     | 6/8 (75%)               | 4/5 (80%)               | 1/3 (33.3%)             | 5/6 (83.3%)             |
| Hep3B SOX9 <sup>-</sup>     | 3/8 (37.5%)             | 0/5 (0%)                | 0/3 (0%)                | 0/6 (0%)                |

Abbreviation: SOX9, sex determining region Y-box 9; Tx, transplantation.

### Supplemental Table 2

#### The tumor initiating frequency in HCC cells

|                             | CSC frequency |          |       | <i>P</i> value  |
|-----------------------------|---------------|----------|-------|-----------------|
|                             | Lower         | Estimate | Upper |                 |
| Huh7 SOX9 <sup>+</sup>      | 1473          | 531      | 192   | <i>P</i> < 0.01 |
| Huh7 SOX9 <sup>-</sup>      | 71609         | 23074    | 7435  |                 |
| HLF SOX9 <sup>+</sup>       | 389           | 92       | 22    | <i>P</i> < 0.01 |
| HLF SOX9 <sup>-</sup>       | 47030         | 17086    | 6207  |                 |
| PLC/PRF/5 SOX9 <sup>+</sup> | 5780          | 2010     | 699   | <i>P</i> < 0.01 |
| PLC/PRF/5 SOX9 <sup>-</sup> | 71609         | 23074    | 7435  |                 |
| Hep3B SOX9 <sup>+</sup>     | 8641          | 3742     | 1621  | <i>P</i> < 0.01 |
| Hep3B SOX9 <sup>-</sup>     | 71609         | 23074    | 7435  |                 |

Abbreviation: SOX9, sex determining region Y-box 9; CSC, cancer stem cell.

### Supplemental Table 3

#### SOX9 and OPN expression of 11 patients with a resection of HCC metastatic region

| Patient | primary HCC                        | metastatic HCC                     | metastatic organ |
|---------|------------------------------------|------------------------------------|------------------|
| #1      | SOX9 <sup>-</sup> OPN <sup>-</sup> | SOX9 <sup>-</sup> OPN <sup>-</sup> | Adrenal          |
| #2      | SOX9 <sup>-</sup> OPN <sup>-</sup> | SOX9 <sup>+</sup> OPN <sup>+</sup> | Lung             |
| #3      | SOX9 <sup>-</sup> OPN <sup>-</sup> | SOX9 <sup>+</sup> OPN <sup>+</sup> | Bone             |
| #4      | SOX9 <sup>-</sup> OPN <sup>-</sup> | SOX9 <sup>+</sup> OPN <sup>+</sup> | Lung             |

|     |            |            |            |
|-----|------------|------------|------------|
| #5  | SOX9- OPN+ | SOX9+ OPN+ | Lung       |
| #6  | SOX9+ OPN+ | SOX9+ OPN+ | Lung       |
| #7  | SOX9+ OPN+ | SOX9+ OPN+ | Brain      |
| #8  | SOX9- OPN- | SOX9+ OPN+ | Adrenal    |
| #9  | SOX9+ OPN+ | SOX9+ OPN+ | Lymph node |
| #10 | SOX9- OPN+ | SOX9+ OPN+ | Lung       |
| #11 | SOX9- OPN- | SOX9- OPN- | Lung       |

Abbreviation: SOX9, sex determining region Y-box 9; OPN, osteopontin.

#### Supplemental Table 4

##### Univariate analysis with respect to outcome in the resection group

| Recurrence-free survival |                    |                                                |                |                               |
|--------------------------|--------------------|------------------------------------------------|----------------|-------------------------------|
| Factors                  | Number of patients | Recurrence-free survival days (median, 95% CI) | <i>P</i> value | Hazard Ratio (median, 95% CI) |
| SOX9 expression          |                    |                                                |                |                               |
| Positive                 | 37                 | 378 (270-485)                                  | 0.027          | 1.74                          |

|                            |    |                |       |             |
|----------------------------|----|----------------|-------|-------------|
| Negative                   | 67 | 765 (460-1069) |       | (1.06-2.86) |
| Age (years)                |    |                |       |             |
| $\geq 65$                  | 65 | 558 (332-784)  | 0.108 | 1.45        |
| $< 65$                     | 39 | 688 (33-1343)  |       | (0.92-2.28) |
| Gender                     |    |                |       |             |
| Male                       | 83 | 644 (469-859)  | 0.131 | 0.63        |
| Female                     | 21 | 351 (276-426)  |       | (0.35-1.15) |
| AST activity (IU/L)        |    |                |       |             |
| $\geq 40$                  | 66 | 568 (269-867)  | 0.318 | 1.26        |
| $< 40$                     | 38 | 664 (406-922)  |       | (0.8-1.98)  |
| ALT activity (IU/L)        |    |                |       |             |
| $\geq 40$                  | 57 | 576 (365-787)  | 0.375 | 1.22        |
| $< 40$                     | 47 | 640 (359-921)  |       | (0.78-1.91) |
| Total bilirubin<br>(mg/dl) |    |                |       |             |
| $> 1.0$                    | 27 | 765 (213-1317) | 0.618 | 1.15        |
| $\leq 1.0$                 | 77 | 558 (316-800)  |       | (0.69-1.89) |
| Albumin (g/dl)             |    |                |       |             |

|                        |    |                |       |             |
|------------------------|----|----------------|-------|-------------|
| <3.5                   | 24 | 231 (72-390)   | 0.003 | 2.74        |
| $\geq 3.5$             | 80 | 674 (453-894)  |       | (1.41-5.32) |
| Platelet count         |    |                |       |             |
| ( $10^4/\text{mm}^3$ ) |    |                |       |             |
| <10                    | 27 | 375 (19-731)   | 0.13  | 1.51        |
| $\geq 10$              | 77 | 640 (521-759)  |       | (0.89-2.58) |
| AFP (ng/ml)            |    |                |       |             |
| $\geq 20$              | 55 | 568 (287-849)  | 0.388 | 1.22        |
| <20                    | 49 | 674 (391-957)  |       | (0.78-1.90) |
| PIVKA-II (mAU/ml)      |    |                |       |             |
| $\geq 40$              | 71 | 473 (210-736)  | 0.368 | 1.24        |
| <40                    | 33 | 653 (529-777)  |       | (0.78-1.97) |
| Hepatitis B infection  |    |                |       |             |
| Present                | 13 | 375 (266-484)  | 0.907 | 0.96        |
| Absent                 | 91 | 653 (503-803)  |       | (0.48-1.91) |
| Hepatitis C infection  |    |                |       |             |
| Present                | 64 | 568 (279-857)  | 0.308 | 1.26        |
| Absent                 | 40 | 674 (348-1000) |       | (0.81-1.98) |



|                       |    |                |       |             |
|-----------------------|----|----------------|-------|-------------|
| Tumor size (cm)       |    |                |       |             |
| $\geq 5$ cm           | 47 | 473 (64-882)   | 0.635 | 1.12        |
| $< 5$ cm              | 57 | 653 (514-792)  |       | (0.71-1.76) |
| Tumor number          |    |                |       |             |
| Multiple              | 33 | 473 (84-862)   | 0.231 | 1.34        |
| Single                | 71 | 586 (463-709)  |       | (0.83-2.17) |
| Tumor differentiation |    |                |       |             |
| Poor                  | 18 | 716 (602-830)  | 0.782 | 0.92        |
| Others                | 80 | 653 (520-786)  |       | (0.49-1.71) |
| Portal Invasion       |    |                |       |             |
| Positive              | 36 | 267 (132-402)  | 0.007 | 2.08        |
| Negative              | 68 | 800 (418-1182) |       | (1.23-3.54) |
| Liver cirrhosis       |    |                |       |             |
| F4                    | 33 | 418 (172-663)  | 0.027 | 1.79        |
| Others                | 71 | 688 (428-948)  |       | (1.07-3.00) |
| Type of resection     |    |                |       |             |
| Anatomic              | 75 | 568 (287-849)  | 0.616 | 1.13        |

| Partial             | 29                       | 674 (387-961)                            |                   | (0.69-1.83)                         |
|---------------------|--------------------------|------------------------------------------|-------------------|-------------------------------------|
| Overall survival    |                          |                                          |                   |                                     |
| Factors             | Number<br>of<br>patients | Overall survival days<br>(median, 95%CI) | <i>P</i><br>value | Hazard Ratio<br>(median, 95%<br>CI) |
| SOX9 expression     |                          |                                          |                   |                                     |
| Positive            | 37                       | 1929 (1018-2840)                         | 0.12              | 1.62                                |
| Negative            | 67                       | 2198 (1929-2467)                         |                   | (0.89-2.94)                         |
| Age (years)         |                          |                                          |                   |                                     |
| $\geq 65$           | 64                       | 2093 (1574-2611)                         | 0.05              | 1.76                                |
| $< 65$              | 40                       | NA                                       |                   | (0.99-3.09)                         |
| Gender              |                          |                                          |                   |                                     |
| Male                | 83                       | 1929 (1085-2773)                         | 0.131             | 0.85                                |
| Female              | 21                       | 2198 (1936-2460)                         |                   | (0.43-1.72)                         |
| AST activity (IU/L) |                          |                                          |                   |                                     |
| $\geq 40$           | 63                       | 2093 (1812-2374)                         | 0.341             | 1.32                                |
| $< 40$              | 41                       | 2286                                     |                   | (0.75-2.34)                         |

|                        |    |                  |       |             |
|------------------------|----|------------------|-------|-------------|
| ALT activity (IU/L)    |    |                  |       |             |
| $\geq 40$              | 57 | 2162 (1901-2423) | 0.872 | 1.05        |
| $< 40$                 | 47 | 2248 (1578-2918) |       | (0.59-1.83) |
| Total bilirubin        |    |                  |       |             |
| (mg/dl)                |    |                  |       |             |
| $> 1.0$                | 27 | 2198 (2071-2325) | 0.971 | 1.01        |
| $\leq 1.0$             | 77 | 2093             |       | (0.54-1.88) |
| Albumin (g/dl)         |    |                  |       |             |
| $< 3.5$                | 24 | 974 (523-1425)   | 0.003 | 4.34        |
| $\geq 3.5$             | 80 | 2286             |       | (2.04-9.25) |
| Platelet count         |    |                  |       |             |
| ( $10^4/\text{mm}^3$ ) |    |                  |       |             |
| $< 10$                 | 27 | 1977 (1089-2865) | 0.155 | 1.61        |
| $\geq 10$              | 77 | 2286             |       | (0.84-3.09) |
| AFP (ng/ml)            |    |                  |       |             |
| $\geq 20$              | 55 | 2093 (1806-2380) | 0.15  | 1.53        |
| $< 20$                 | 49 | NA               |       | (0.88-2.65) |
| PIVKA-II (mAU/ml)      |    |                  |       |             |

|                       |    |                  |       |             |
|-----------------------|----|------------------|-------|-------------|
| $\geq 40$             | 71 | 2162             | 0.845 | 1.06        |
| $< 40$                | 33 | 2198             |       | (0.59-1.91) |
| Hepatitis B infection |    |                  |       |             |
| Present               | 13 | NA               | 0.908 | 0.93        |
| Absent                | 91 | 2198 (1907-2489) |       | (0.41-2.15) |
| Hepatitis C infection |    |                  |       |             |
| Present               | 64 | NA               | 0.119 | 1.57        |
| Absent                | 40 | 1960 (1605-2315) |       | (0.89-2.75) |
| Tumor size (cm)       |    |                  |       |             |
| $\geq 5\text{cm}$     | 78 | 1901 (1019-2783) | 0.09  | 1.63        |
| $< 5\text{cm}$        | 26 | 2248 (2036-2461) |       | (0.93-2.87) |
| Tumor number          |    |                  |       |             |
| Multiple              | 33 | 2248             | 0.157 | 0.66        |
| Single                | 71 | 1977 (1501-2453) |       | (0.37-1.18) |
| Tumor differentiation |    |                  |       |             |
| Poor                  | 18 | 1095 (NA-2670)   | 0.171 | 1.77        |
| Others                | 80 | 2248 (2053-2443) |       | (0.78-4.03) |
| Portal invasion       |    |                  |       |             |

|                   |    |                  |       |             |
|-------------------|----|------------------|-------|-------------|
| Positive          | 36 | 1049 (864-1234)  | 0.007 | 2.61        |
| Negative          | 68 | 2286             |       | (1.38-4.92) |
| Liver cirrhosis   |    |                  |       |             |
| F4                | 33 | 1498 (415-2581)  | 0.004 | 2.53        |
| Others            | 71 | NA               |       | (1.35-4.71) |
| Type of resection |    |                  |       |             |
| Anatomic          | 75 | 2198 (1403-2993) | 0.228 | 1.44        |
| Partial           | 29 | 2248 (2032-2464) |       | (0.79-2.62) |

Abbreviation: SOX9, sex determining region Y-box 9; AST, asparatate aminotransferase; ALT, alanine aminotransferase; AFP, alpha-fetoprotein; PIVKA-II, protein induced by vitamin K absence or antagonists-II; NA, not available; CI, confidence interval.

### Supplemental Table 5

#### Univariate analysis with respect to outcome in the transplantation group

| Recurrence-free survival |           |                               |                |                           |
|--------------------------|-----------|-------------------------------|----------------|---------------------------|
| Factors                  | Number of | Recurrence-free survival days | <i>P</i> value | Hazard Ratio (median, 95% |
|                          |           |                               |                |                           |

|                       | patients | (median, 95% CI) |       | CI          |
|-----------------------|----------|------------------|-------|-------------|
| SOX9 expression       |          |                  |       |             |
| Positive              | 20       | 2344 (1894-2795) | 0.044 | 6.1         |
| Negative              | 42       | 2746 (2624-2869) |       | (1.05-35.4) |
| Age (years)           |          |                  |       |             |
| $\geq 60$             | 18       | 2571 (2225-2917) | 0.758 | 1.33        |
| $< 60$                | 44       | 2651 (2453-2849) |       | (0.22-7.98) |
| Gender                |          |                  |       |             |
| Male                  | 47       | NA               | 0.151 | 3.83        |
| Female                | 15       | NA               |       | (0.61-24.0) |
| AFP (ng/ml)           |          |                  |       |             |
| $\geq 20$             | 37       | NA               | 0.65  | 1.45        |
| $< 20$                | 25       | NA               |       | (0.29-7.36) |
| PIVKA-II (mAU/ml)     |          |                  |       |             |
| $\geq 40$             | 30       | NA               | 0.08  | 4.11        |
| $< 40$                | 32       | NA               |       | (0.83-20.4) |
| Hepatitis B infection |          |                  |       |             |

|                       |              |                                          |                   |                              |
|-----------------------|--------------|------------------------------------------|-------------------|------------------------------|
| Present               | 42           | 2655 (2479-2850)                         | 0.34              | 0.64                         |
| Absent                | 20           | 2518 (2152-2885)                         |                   | (0.06-1.58)                  |
| Hepatitis C infection |              |                                          |                   |                              |
| Present               | 24           | 2484 (2140-2828)                         | 0.156             | 2.31                         |
| Absent                | 38           | 2706 (2533-2880)                         |                   | (0.41-12.9)                  |
| Milan criteria        |              |                                          |                   |                              |
| over                  | 28           | NA                                       | 0.004             | 10.5                         |
| within                | 34           | NA                                       |                   | (2.07-52.8)                  |
| Tumor differentiation |              |                                          |                   |                              |
| Poor                  | 54           | 2736 (2600-2872)                         | 0.003             | 49.1                         |
| Others                | 8            | 1744 (986-2501)                          |                   | (3.89-618.8)                 |
| Portal Invasion       |              |                                          |                   |                              |
| Positive              | 44           | NA                                       | <0.001            | 55.5                         |
| Negative              | 18           | NA                                       |                   | (8.71-354.4)                 |
| Overall survival      |              |                                          |                   |                              |
| Factors               | Number<br>of | Overall survival days<br>(median, 95%CI) | <i>P</i><br>value | Hazard Ratio<br>(median, 95% |

|                       | patients |                  |       | CI          |
|-----------------------|----------|------------------|-------|-------------|
| SOX9 expression       |          |                  |       |             |
| Positive              | 20       | 2407 (2007-2806) | 0.29  | 2.19        |
| Negative              | 42       | 2634 (2463-2805) |       | (0.51-9.33) |
| Age (years)           |          |                  |       |             |
| $\geq 60$             | 18       | 2583 (2254-2913) | 0.863 | 0.87        |
| $< 60$                | 44       | 2570 (2365-2775) |       | (0.19-4.04) |
| Gender                |          |                  |       |             |
| Male                  | 47       | 2537 (2396-2679) | 0.321 | 2.14        |
| Female                | 15       | 2508 (2283-2733) |       | (0.48-9.59) |
| AFP (ng/ml)           |          |                  |       |             |
| $\geq 20$             | 37       | NA               | 0.96  | 0.97        |
| $< 20$                | 25       | NA               |       | (0.26-3.62) |
| PIVKA-II (mAU/ml)     |          |                  |       |             |
| $\geq 40$             | 30       | NA               | 0.27  | 2.09        |
| $< 40$                | 32       | NA               |       | (0.56-7.72) |
| Hepatitis B infection |          |                  |       |             |



|                       |    |                  |       |             |
|-----------------------|----|------------------|-------|-------------|
| Present               | 42 | 2600 (2405-2796) | 0.479 | 1.66        |
| Absent                | 20 | 2487 (2137-2837) |       | (0.41-6.65) |
| Hepatitis C infection |    |                  |       |             |
| Present               | 24 | 2459 (2127-2390) | 0.344 | 0.53        |
| Absent                | 38 | 2632 (2441-2823) |       | (0.14-2.01) |
| Milan criteria        |    |                  |       |             |
| over                  | 28 | 2120 (1814-2426) | 0.029 | 4.37        |
| within                | 34 | 2770 (2654-2885) |       | (1.16-16.4) |
| Tumor differentiation |    |                  |       |             |
| Poor                  | 54 | 2657 (2505-2810) | 0.03  | 10.3        |
| Others                | 8  | 1786 (1067-2504) |       | (1.26-84.8) |
| Portal Invasion       |    |                  |       |             |
| Positive              | 44 | 2744 (2617-2871) | 0.002 | 11.6        |
| Negative              | 18 | 2042 (1585-2500) |       | (2.46-55.1) |

Abbreviation: SOX9, sex determining region Y-box 9; AFP, alpha-fetoprotein; PIVKA-II, protein induced by vitamin K absence or antagonists-II; NA, not available; CI, confidence interval.

### Supplemental Table 6

Sensitivity and Specificity of OPN, AFP, and PIVKA-II for the evaluation of SOX9 expression in the resection group

| Variable (optimal or clinical cutoff value) | Sensitivity (%)<br>(95% CI) | Specificity (%)<br>(95% CI) |
|---------------------------------------------|-----------------------------|-----------------------------|
| OPN (100 ng/ml)                             | 93 (77–99)                  | 75 (59–87)                  |
| AFP (20 ng/ml)                              | 50 (31–69)                  | 48 (32–64)                  |
| PIVKA-II (40 mAU/ml)                        | 43 (24–63)                  | 70 (53–83)                  |

Abbreviation: OPN, osteopontin; AFP, alpha-fetoprotein; PIVKA-II, protein induced by vitamin K absence 2; CI, confidence interval.

### Supplemental Table 7

Clinicopathological findings of HCC patients

| Resection group            | SOX9 expression    |                    |                |
|----------------------------|--------------------|--------------------|----------------|
|                            | Positive<br>(n=37) | Negative<br>(n=67) | <i>P</i> value |
| Age (years, mean $\pm$ SD) | 65.5 $\pm$ 9.5     | 67.3 $\pm$ 8.3     | 0.575          |

|                                       |       |       |       |
|---------------------------------------|-------|-------|-------|
| Gender (male/female)                  | 30/7  | 53/14 | 0.988 |
| Total bilirubin (> 1.0 mg/dl)         | 10    | 17    | 0.746 |
| Albumin (< 3.5 g/dl)                  | 11    | 13    | 0.374 |
| Platelet (< 10.0×10 <sup>4</sup> /μl) | 9     | 17    | 0.836 |
| AFP (≥ 20 ng/ml)                      | 24    | 35    | 0.301 |
| PIVKA-II (≥ 40 mAU/ml)                | 25    | 46    | 0.909 |
| HBs Ag positive                       | 7     | 6     | 0.126 |
| HCV Ab positive                       | 23    | 42    | 0.923 |
| Tumor size (> 5 cm)                   | 12    | 29    | 0.278 |
| Tumor differentiation                 |       |       | 0.396 |
| Well                                  | 7     | 16    |       |
| Moderate                              | 22    | 36    |       |
| Poorly                                | 5     | 12    |       |
| Unknown                               | 3     | 3     |       |
| UICC Stage (III-IV/I-II)              | 21/16 | 37/30 | 0.880 |
| Serosal invasion                      | 4     | 10    | 0.347 |
| Portal invasion                       | 13    | 23    | 0.934 |
| Liver cirrhosis                       | 11    | 22    | 0.745 |

|                            |                    |                    |                |
|----------------------------|--------------------|--------------------|----------------|
| Type of operation          |                    |                    | 0.755          |
| Anatomic resection         | 25                 | 49                 |                |
| Limited resection          | 12                 | 18                 |                |
|                            | SOX9 expression    |                    |                |
| Transplantation group      | Positive<br>(n=20) | Negative<br>(n=42) | <i>P</i> value |
| Age (years, mean $\pm$ SD) | 56.9 $\pm$ 6.1     | 57.8 $\pm$ 4.6     | 0.523          |
| Gender (male/female)       | 18/2               | 29/13              | 0.072          |
| Laboratory data            |                    |                    |                |
| AFP ( $\geq$ 20 ng/ml)     | 12                 | 25                 | 0.971          |
| PIVKA ( $\geq$ 40 mAU/ml)  | 12                 | 18                 | 0.279          |
| HBs Ag positive            | 8                  | 12                 | 0.368          |
| HCV Ab positive            | 12                 | 26                 | 0.886          |
| Pathology                  |                    |                    |                |
| Tumor size (> 5 cm)        | 2                  | 1                  | 0.191          |
| Tumor differentiation      |                    |                    | 0.638          |
| Poorly                     | 2                  | 6                  |                |

|                          |    |    |       |
|--------------------------|----|----|-------|
| Others                   | 18 | 36 |       |
| Portal invasion          | 8  | 10 | 0.189 |
| Transplantation criteria |    |    |       |
| within Milan             | 8  | 26 | 0.105 |

Abbreviation: AFP, alpha-fetoprotein; PIVKA-II, protein induced by vitamin K absence or antagonists-II; HBs Ag, hepatitis B antigen; HCV Ab, hepatitis C antibody; UICC, union for international cancer control.

### Supplemental Table 8

#### Primer sequences for PCR, RT-PCR, qPCR, and qRT-PCR

| Gene          | Sense primer            | Antisense primer      |
|---------------|-------------------------|-----------------------|
| SOX9          | GCGTATGAATCTCCTGGACC    | GTCCTCCTCGCTCTCCTTCT  |
| SOX9 promoter | GTGGAGCGTTTTGTCTGC      | TGAAACTGGCGAGTCTCC    |
| EpCAM         | AATGTGTGTGCGTGGA        | TTCAAGATTGGTAAAGCCAGT |
| CD90          | ATGAACCTGGCCATCAGCATCGC | CAGGCTGAACTCGTACTGGA  |
| CD133         | AAGGCATATGAATCCAAAATTGA | CCACCAGAGGCATCAGAATAA |
| CD24          | ATGGGCAGAGCAATGGTG      | TGGAATAAATCTGCGTGGGTA |

|            |                          |                          |
|------------|--------------------------|--------------------------|
| CD13       | CATCCATCAGAGATGGCAGAC    | TGCTGAAGAGATCGTTCTGG     |
| SALL4      | TGCAGCAGTTGGTGGAGAAC     | TCGGTGGCAAATGAGACATTC    |
| K19        | TTTGAGACGGAACAGGCTCT     | TCAGTAACCTCGGACCTGCT     |
| pEGFP1     | GTTATTACTAGCGCTACCGGACTC | CGGCCATGATATAGACGTTG     |
| TGFbR1     | TGCTGCAATCAGGACCATTG     | TCCTCTTCATTTGGCACTCG     |
| TGFbR2     | TGCTCACCTCCACAGTGATC     | TCTGGAGCCATGTATCTTGC     |
| snail1     | ACCACTATGCCGCGCTCTT      | GGTCGTAGGGCTGCTGGAA      |
| E-cadherin | CGACCCAACCCAAGAATCTA     | TTCACAGTCACACACGCTGA     |
| vimentin   | GGCTCAGATTCAGGAACAGC     | GCCTCAGAGAGGTCAGCAAA     |
| MRP5       | CACCATCCACGCCTACAATAAA   | CACCGCATCGCACACGTA       |
| OPN        | AGTTTCGCAGACCTGACATCCAGT | TTCATAACTGTCCTTCCCACGGCT |
| OPN ORF    | CCGACCAAGGAAAACCTCACT    | CTCCTTTTAATTGACCTCAG     |
| cyclin D1  | CTGGAGGTCTGCGAGGAACA     | CCTTCATCTTAGAGGCCACGAA   |
| ACTb       | TCATGAAGATCCTCACCGAG     | TTGCCAATGGTGATGACCTG     |

Abbreviation: SOX9, sex determining region Y-box 9; pEGFP1, plasmid EGFP-1;

EpCAM; epithelial cell adhesion molecule; CD90, cluster of differentiation 90; SALL4,

sal-like protein 4; K19, keratin 19; TGFbR1, TGF-beta receptor 1; TGFbR2, TGF-beta

receptor 2; MRP5, multidrug resistance protein 5; OPN, osteopontin; ORF, open reading

frame; ACTb, actin-beta.

### Supplemental Figure legends

#### Supplemental Fig. 1 EGFP-marking of the SOX9<sup>+</sup> cells in human HCC cell lines. (A)

RT-PCR analysis of SOX9 in the four HCC cell lines. (B) Phase-contrast images of the stable transfectants confirmed successful transfection of SOX9-EGFP transgene. Scale bar represents 100  $\mu$ m. (C) Immunocytochemistry of stable transfectants showed the co-localization of SOX9 and GFP expression in SOX9<sup>+</sup> cells (left panel). The ratios of SOX9<sup>+</sup>EGFP<sup>+</sup> cells to all SOX9<sup>+</sup> cells were > 95% (right panel). Data are shown as the mean  $\pm$  SD. (D) FACS analyses of stable transfectants. (E) qPCR analyses of pEGFP1 gene in the genomic DNA of sorted EGFP<sup>+</sup> and EGFP<sup>-</sup> cells (Student's *t*-test, n.s.; not significant). Data are shown as the mean  $\pm$  SD. (F) qRT-PCR analyses of EpCAM, CD90, CD133, CD24, CD13, and K19 in SOX9<sup>+</sup> and SOX9<sup>-</sup> cells (Student's *t*-test, \*  $P < 0.05$ ). Data are shown as the mean  $\pm$  SD. Note that previously reported HCC-CSC markers were expressed more in SOX9<sup>+</sup> populations.

#### Supplemental Fig. 2 Cancer stem cell properties of SOX9<sup>+</sup> HLF, PLC/PRF/5, and Hep3B

cells *in vitro*. (A) Single-cell culture of SOX9<sup>+</sup> and SOX9<sup>-</sup> cells. In all three cell lines,

FACS analyses revealed that isolated SOX9-EGFP<sup>+</sup> cell differentiated both EGFP<sup>+</sup> and EGFP<sup>-</sup> cell fraction, whereas isolated SOX9-EGFP<sup>-</sup> cell only to SOX9<sup>-</sup> cell fraction. (B) Cell proliferation assays showed SOX9<sup>+</sup> cells proliferate more than SOX9<sup>-</sup> cells (repeated-measures ANOVA, \*\*  $P < 0.01$ ). (C) Microscopic appearance and the colony numbers in the anchorage-independent growth assay (Student's  $t$ -test, \*  $P < 0.05$ ). (D) Phase-contrast images in the sphere-forming assay. (E) IC<sub>50</sub> of 5-FU in SOX9<sup>+</sup> and SOX9<sup>-</sup> cells (left panel,  $F$ -test, \*  $P < 0.05$ ) and qRT-PCR analyses of MRP5 in SOX9<sup>+</sup> and SOX9<sup>-</sup> cells (right panel, Student's  $t$ -test, \*  $P < 0.05$ ).

**Supplemental Fig. 3 Cancer stem cell properties of SOX9<sup>+</sup> HLF, PLC/PRF/5, and Hep3B**

**cells *in vivo*.** (A) Xenotransplantation of SOX9<sup>+</sup> and SOX9<sup>-</sup> cells in NOD/SCID mice, the formed tumor, and the tumor incidence. Note the higher incidence of tumor formation by SOX9<sup>+</sup> cell transplantation (log-rank test, HLF; \*\*  $P < 0.01$ , PLC/PRF/5; \*  $P < 0.05$ , Hep3B;  $P = 0.059$ ). (B) Development of formed tumor from transplanted SOX9<sup>+</sup> or SOX9<sup>-</sup> cells (repeated-measures ANOVA, HLF;  $P = 0.08$ , PLC/PRF/5;  $P = 0.10$ , Hep3B;  $P = 0.05$ ). Data are shown as the mean  $\pm$  SD. (C) Immunohistochemical analysis of tumor. Note that SOX9<sup>+</sup> and SOX9<sup>-</sup> cells detected in SOX9<sup>+</sup> cell-driven tumor. Scale bar represents 100  $\mu$ m. (D) FACS analyses of dissociated tumor cells confirmed bi-potent



differentiation ability conserved in serial transplantation of SOX9<sup>+</sup>.

**Supplemental Fig. 4 Functional rescue experiments of TGFb/Smad signaling in SOX9<sup>-</sup>**

**Huh7 cells.** (A) Western blot analysis showed pSmad2 upregulation in SOX9<sup>-</sup> Huh7 cells by high dose TGFb1 stimulation (30 ng/ml for 24 h). (B) Upon high dose TGFb1 stimulation (30 ng/ml), SOX9<sup>-</sup> Huh7 cells showed the superior sphere-forming ability (left panel) and proliferation ability (right panel) compared to the control SOX9<sup>-</sup> Huh7 cells without TGFb1 stimulation (repeated-measures ANOVA, \*  $P < 0.05$ ).

**Supplemental Fig. 5 Functional rescue experiments of Wnt/beta-catenin pathway in**

**SOX9<sup>-</sup> HLF cells.** (A) CHIR99021-stimulated SOX9<sup>-</sup> HLF cells showed significantly higher TCF/LEF activity and cyclin D1 expression compared to the control SOX9<sup>-</sup> HLF cells without CHIR99021 stimulation (Student's *t*-test, \*  $P < 0.05$ ). (B) CHIR99021-stimulated SOX9<sup>-</sup> HLF cells showed superior sphere-forming ability (left panel) and proliferation (right panel) ability compared to the control SOX9<sup>-</sup> HLF cells without CHIR99021 stimulation (repeated-measures ANOVA, \*  $P < 0.05$ ).

**Supplemental Fig. 6 Correlation of SOX9 and OPN expressions in human HCC. (A)**

Double staining of SOX9 and OPN in primary HCC (left panels) and in HCC metastatic lesions (right panels). Scale bar represents 100  $\mu\text{m}$ . (B) Correlation between SOX9 and OPN expression in the primary and metastatic HCC (Fisher's exact test, \*\*  $P < 0.01$ ).

**Supplemental Fig. 7 Gain/loss of SOX9 or OPN functions in HCC cells.** (A) qRT-PCR analyses confirmed successful knockdown of SOX9 expression by siRNA (KD-SOX9). (B) Efficient reduction of OPN expression by siRNA (KD-OPN) revealed by qRT-PCR. (C) qRT-PCR analyses of SOX9 in the cells transfected with control-mock-vector or CMV promoter-driven SOX9-expression-vector. (D) Successful OPN overexpression by OPN-expression-vector. Data are shown as the mean  $\pm$  SD (Student's  $t$ -test, \*  $P < 0.05$ , KD-NC; control knockdown, KD-SOX9; SOX9 knockdown, KD-OPN; OPN knockdown, EX-NC; control overexpression, EX-SOX9; SOX9 overexpression, EX-OPN; OPN overexpression).

## Supplemental Figure 1

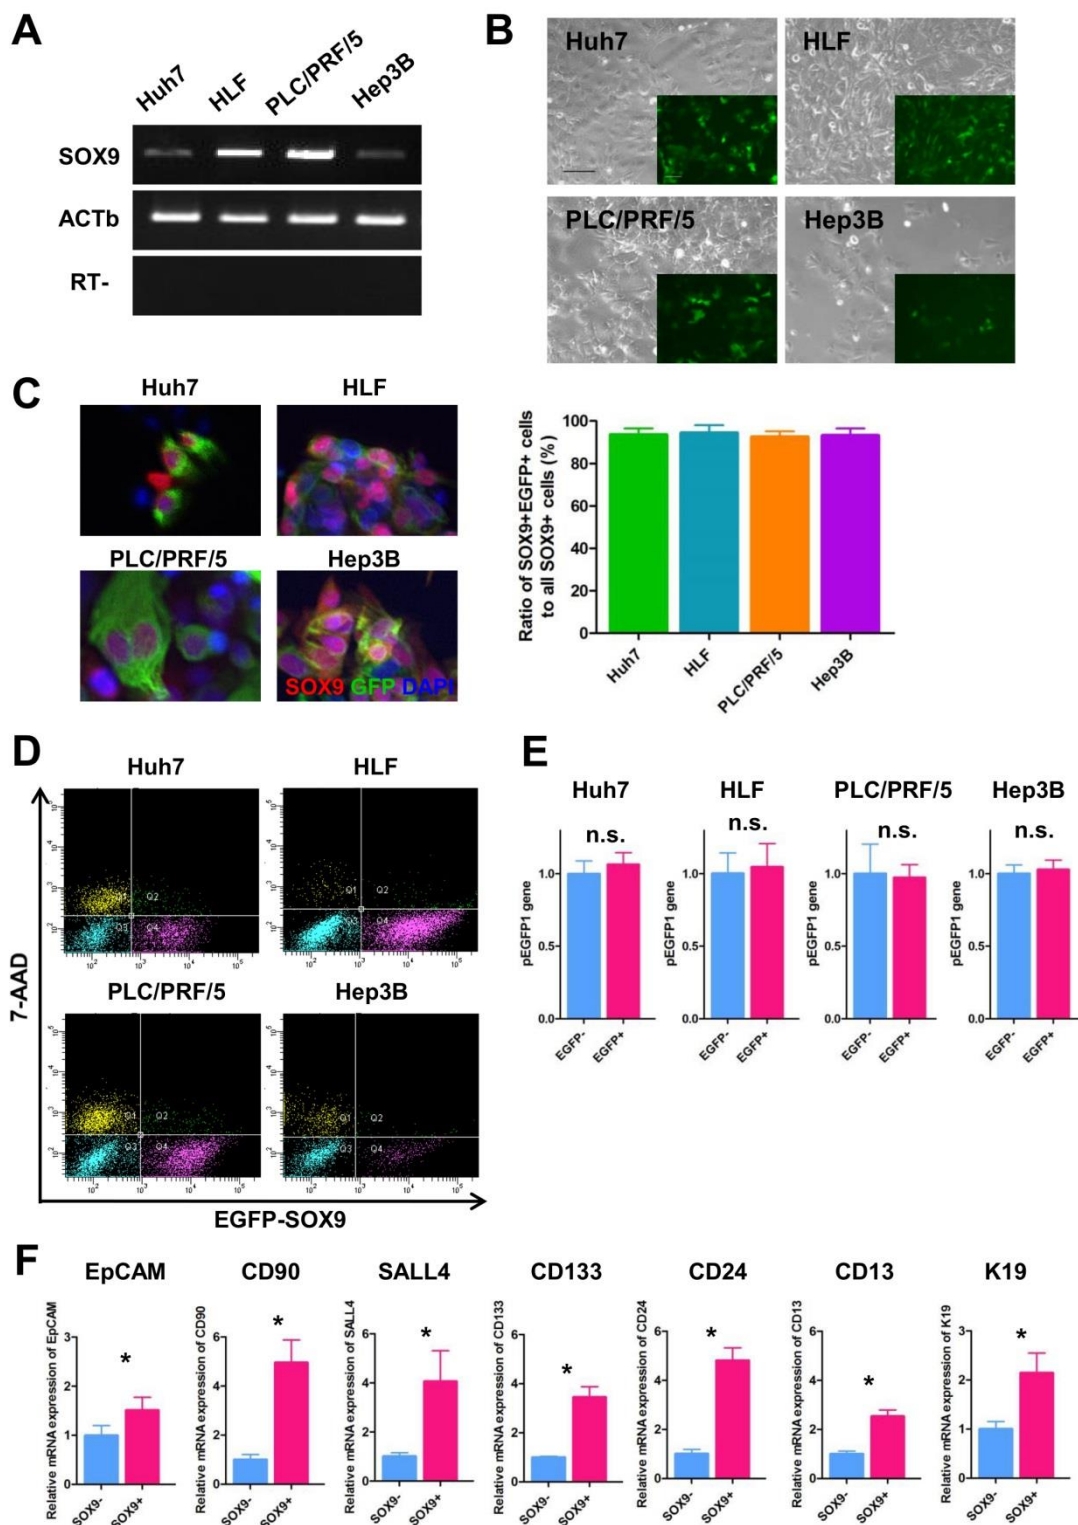

## Supplemental Figure 2

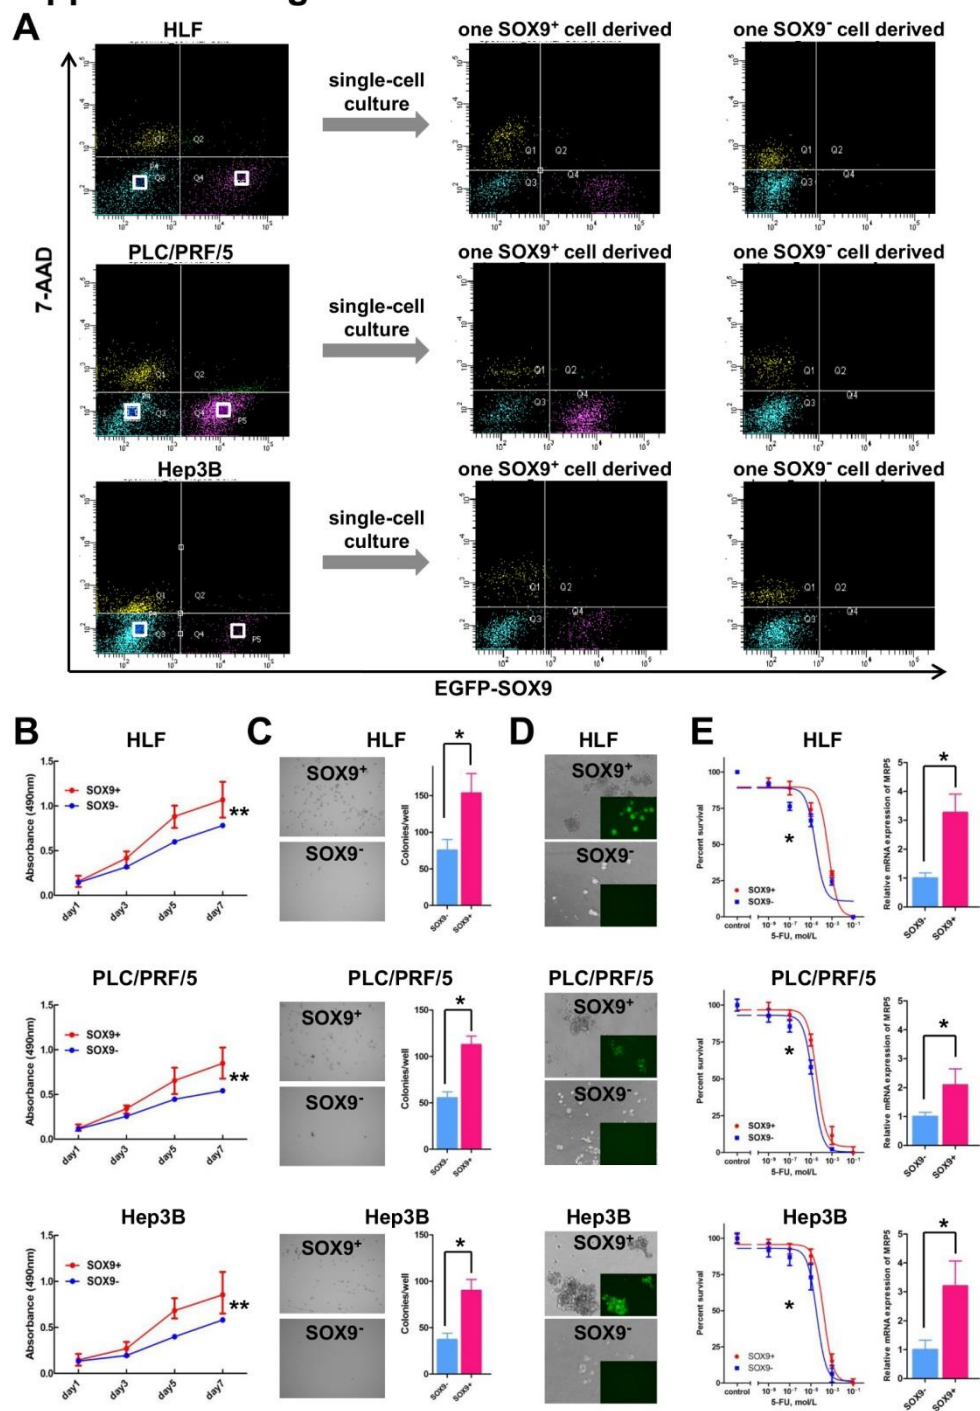

## Supplemental Figure 3

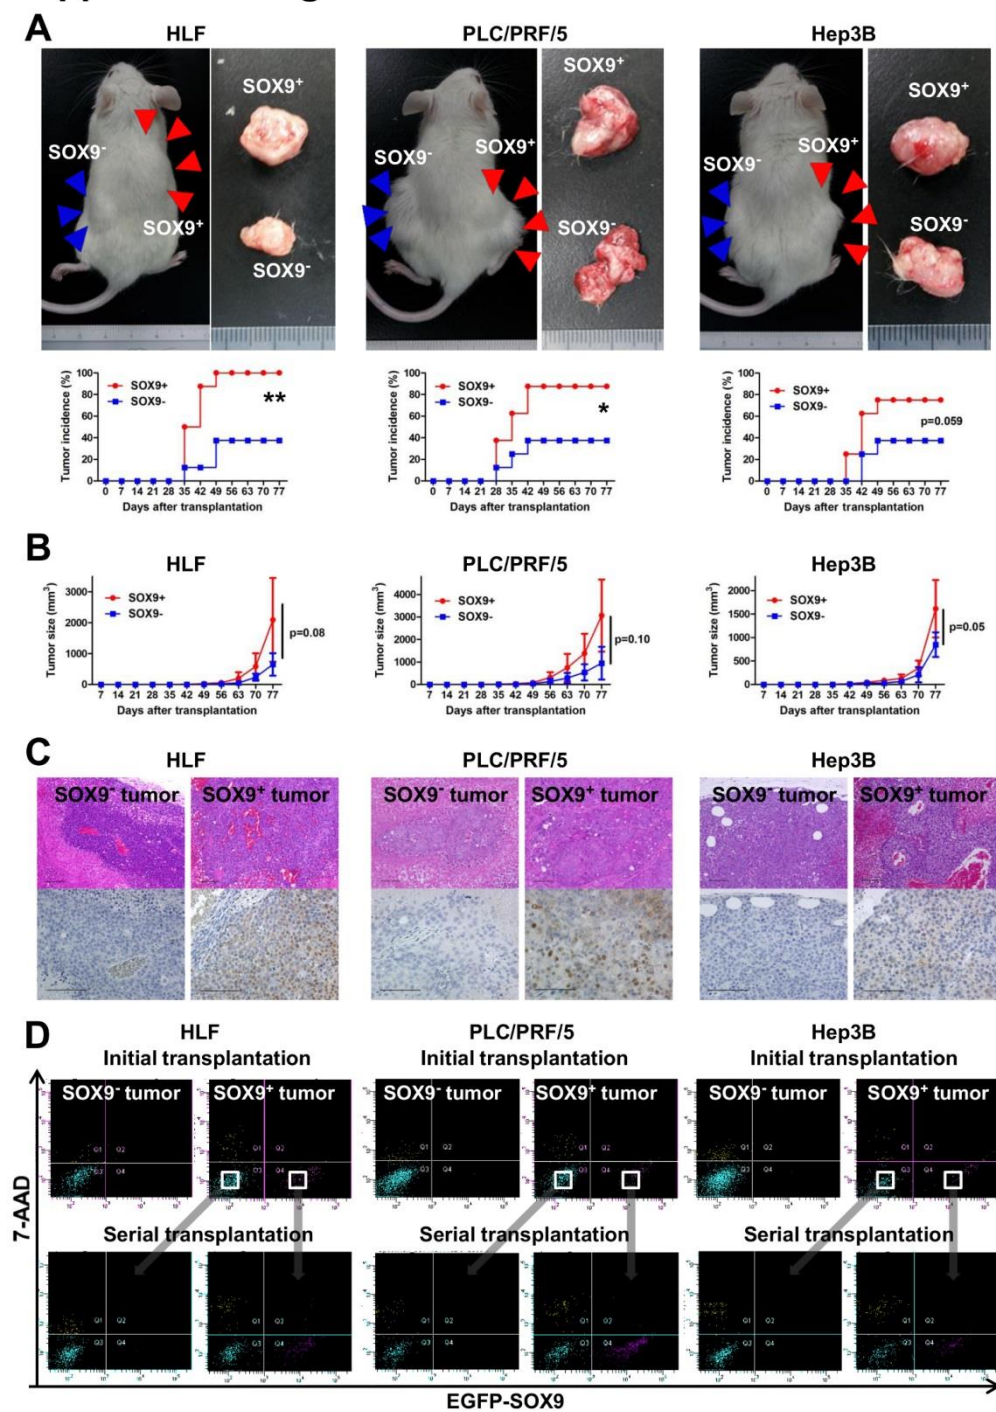

## Supplemental Figure 4

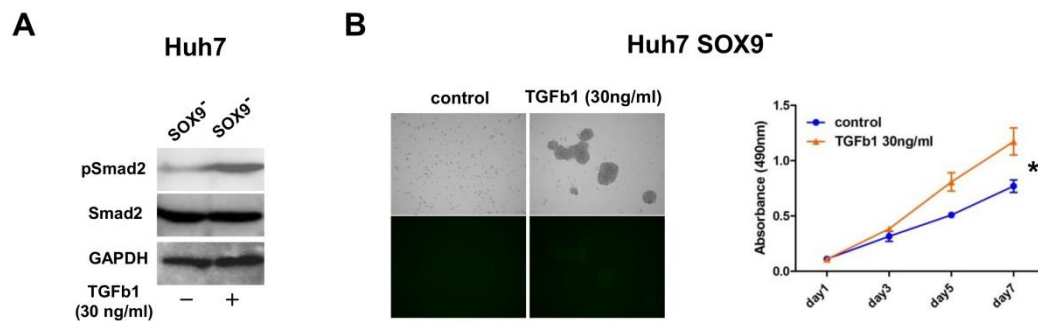

## Supplemental Figure 5

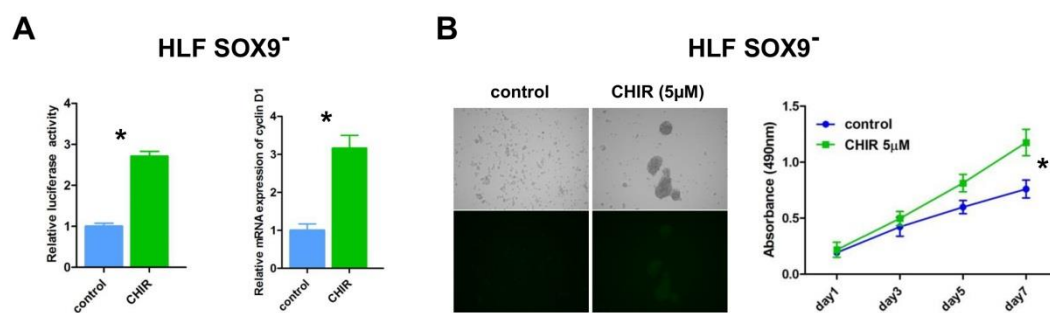



## Supplemental Figure 6

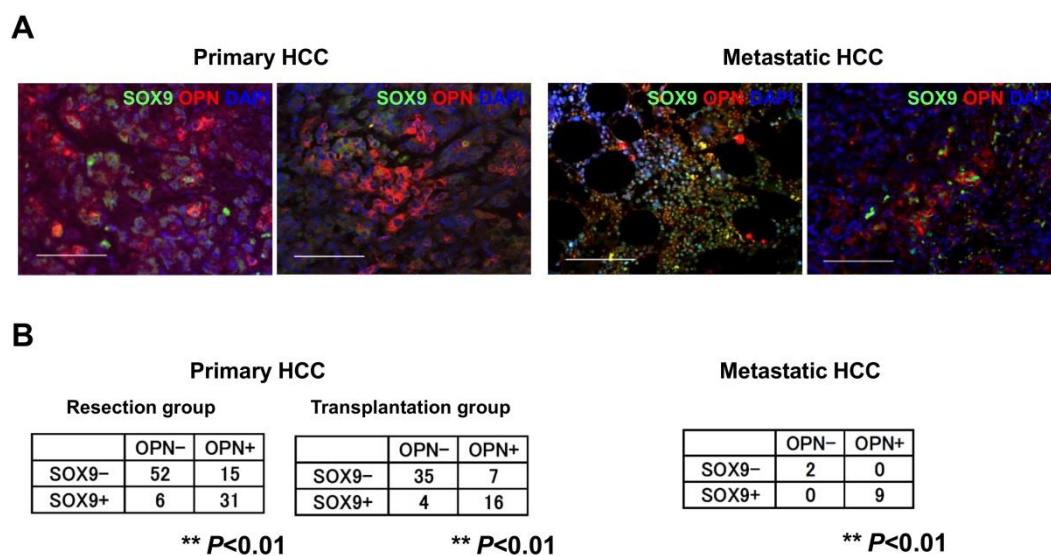

## Supplemental Figure 7

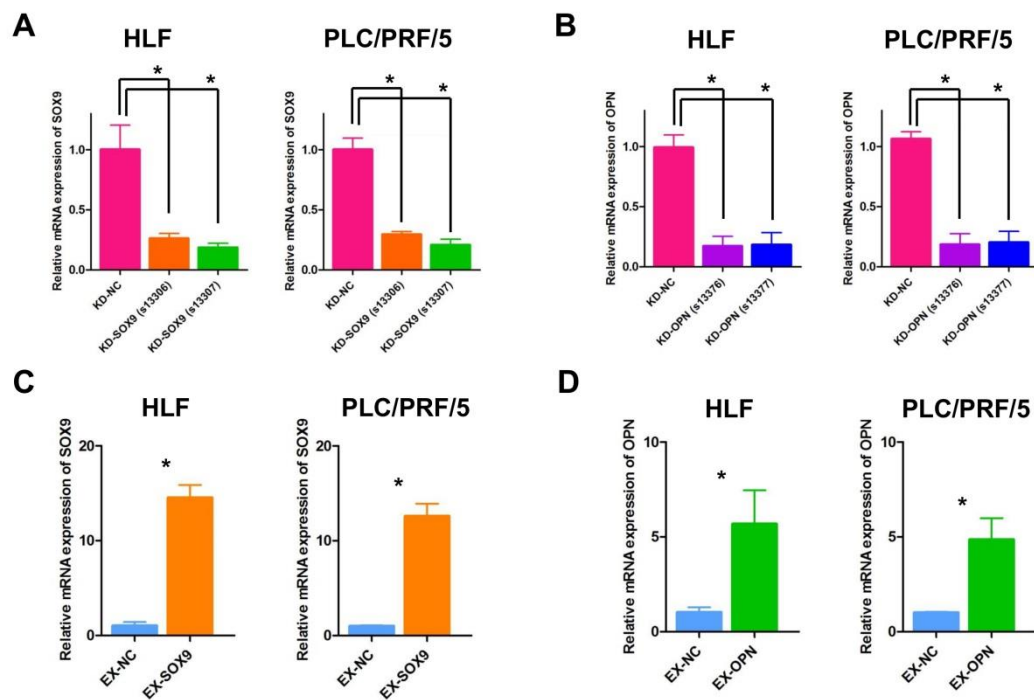

Supplement: srep30489-s1.pdf [file srep30489-s1.pdf]
